# Supplementary material for: New dyads using (metallo)porphyrins as ancillary ligands in polypyridine ruthenium complexes. Synthesis and electronic properties
Source: Royal Society of Chemistry journal article supplement (doi:10.1039/c2dt31656k), 2012-01-01

## Supporting Information to

# New Dyads using (Metallo)porphyrins as Ancillary Ligand in Polypyridine Ruthenium Complexes. Synthesis and Electronic properties

By

Fabien Lachaud,<sup>a</sup> Christophe Jeandon,<sup>b</sup> Antonio Monari,<sup>c</sup> Xavier Assfeld,<sup>c</sup> Marc Beley,<sup>a</sup> Romain Ruppert<sup>\*b</sup> and Philippe C. Gros<sup>\*a</sup>

### Table of Contents

|                                           |         |
|-------------------------------------------|---------|
| X-ray Structures of P2                    | S2      |
| <sup>1</sup> H NMR spectra of P3 and C2   | S3      |
| HR Mass spectra of complexes C1 C2 and C3 | S4-S5   |
| Cyclic voltammogram                       | S5-S10  |
| Emission Spectra                          | S10-S13 |

**X-Ray structures of P2 showing intermolecular hydrogen bonding between NH<sub>2</sub> and oxygen of the enaminoketone moieties**

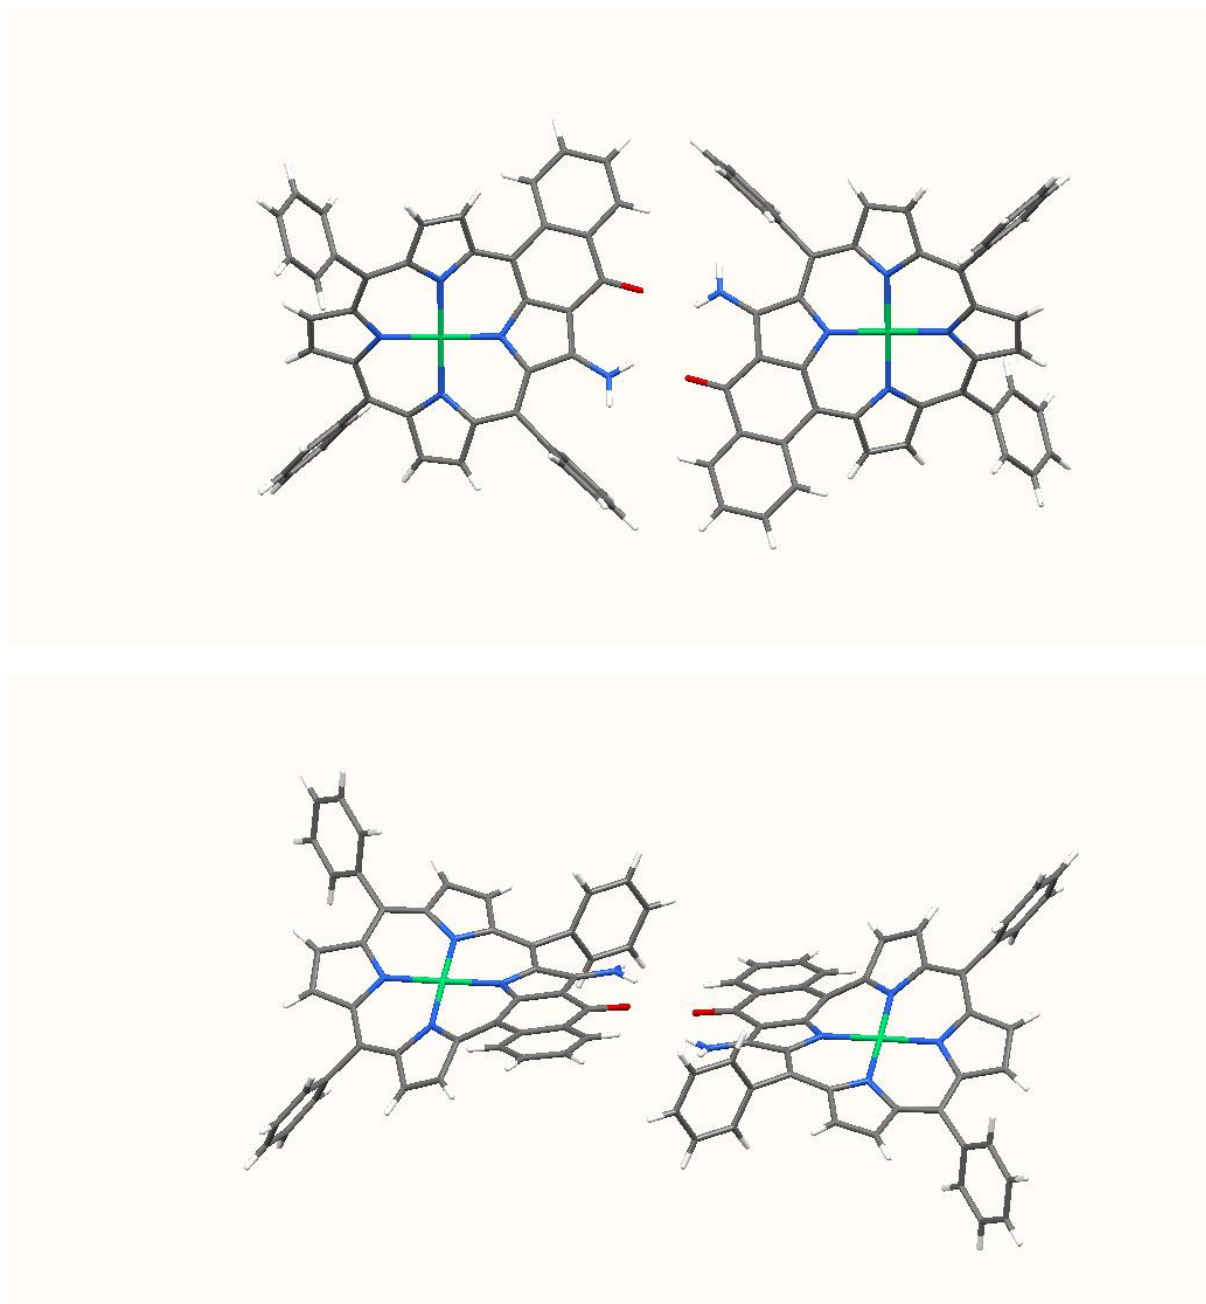

$^1\text{H}$  NMR (400MHz, DMF- $d_7$ ) of porphyrin **P3**

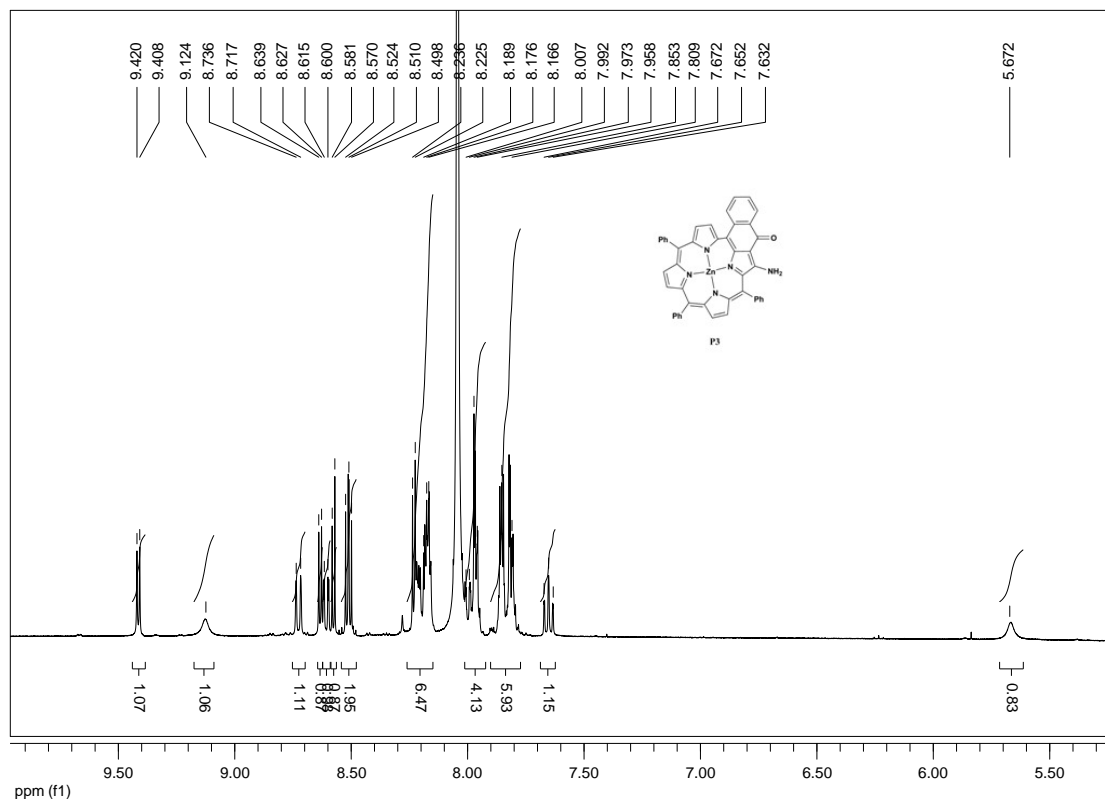

$^1\text{H}$  NMR (400MHz,  $\text{CD}_3\text{CN}$ ) of porphyrin **C2**

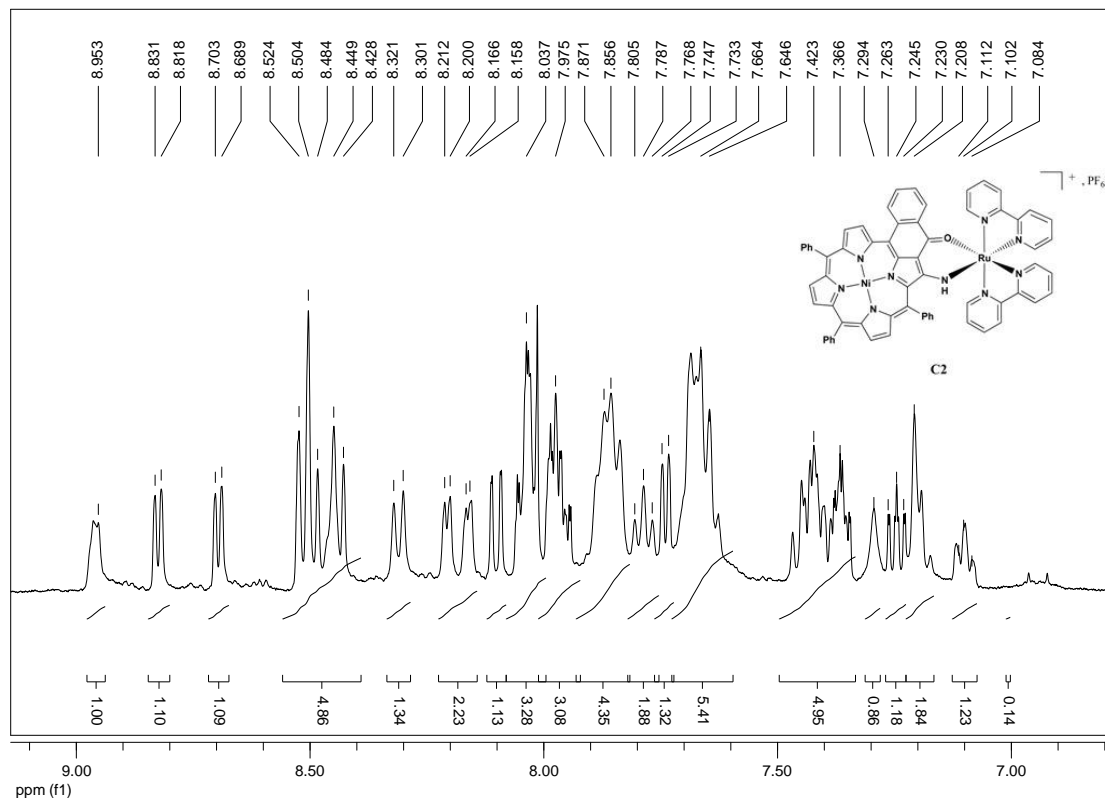

## HR mass spectrum of C1

### Acquisition Parameter

|             |            |                       |           |                  |           |
|-------------|------------|-----------------------|-----------|------------------|-----------|
| Source Type | ESI        | Ion Polarity          | Positive  | Set Nebulizer    | 0.4 Bar   |
| Focus       | Not active | Set Capillary         | 4500 V    | Set Dry Heater   | 190 °C    |
| Scan Begin  | 250 m/z    | Set End Plate Offset  | -500 V    | Set Dry Gas      | 4.0 l/min |
| Scan End    | 2500 m/z   | Set Collision Cell RF | 600.0 Vpp | Set Divert Valve | Source    |

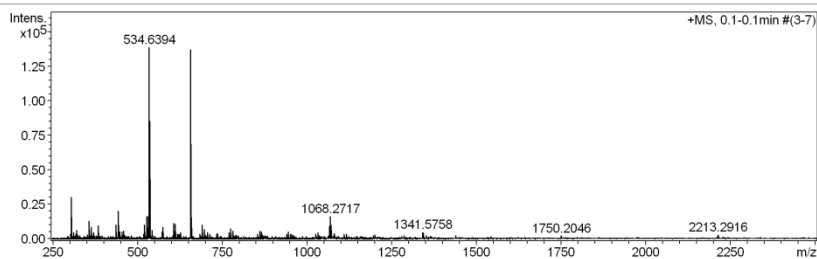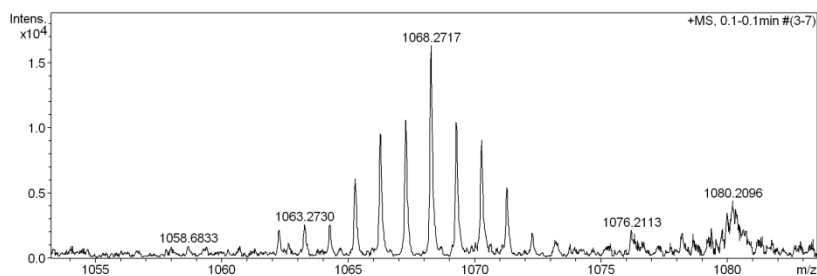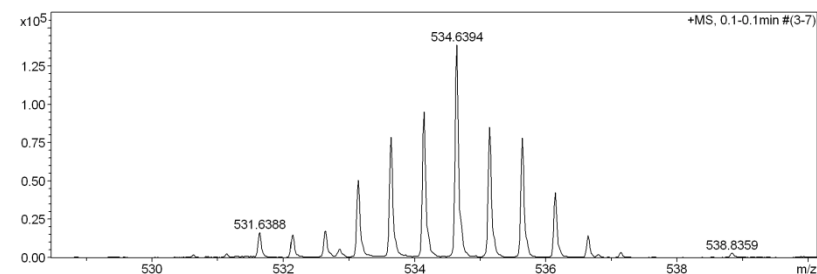

## HR mass spectrum of C2

### Acquisition Parameter

|             |            |                       |           |                  |           |
|-------------|------------|-----------------------|-----------|------------------|-----------|
| Source Type | ESI        | Ion Polarity          | Positive  | Set Nebulizer    | 0.4 Bar   |
| Focus       | Not active | Set Capillary         | 3500 V    | Set Dry Heater   | 190 °C    |
| Scan Begin  | 250 m/z    | Set End Plate Offset  | -500 V    | Set Dry Gas      | 4.0 l/min |
| Scan End    | 2500 m/z   | Set Collision Cell RF | 600.0 Vpp | Set Divert Valve | Source    |

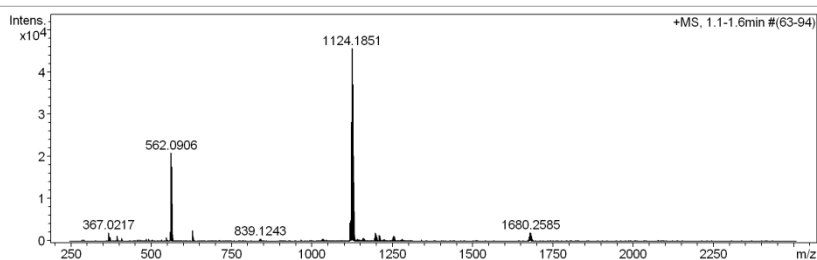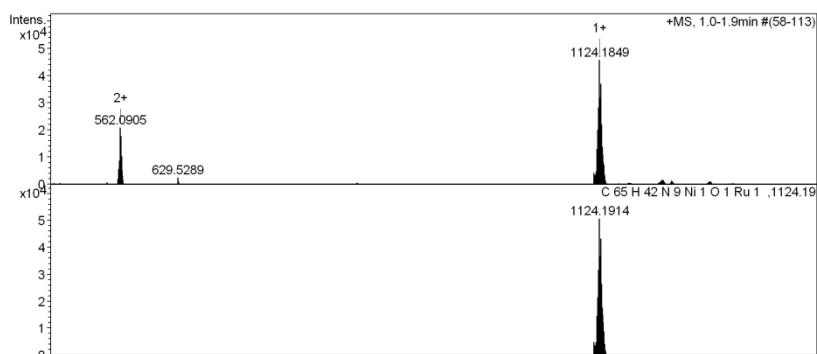

## HR mass spectrum of C3

### Acquisition Parameter

|             |            |                       |           |                  |           |
|-------------|------------|-----------------------|-----------|------------------|-----------|
| Source Type | ESI        | Ion Polarity          | Positive  | Set Nebulizer    | 0.4 Bar   |
| Focus       | Not active | Set Capillary         | 4500 V    | Set Dry Heater   | 190 °C    |
| Scan Begin  | 250 m/z    | Set End Plate Offset  | -500 V    | Set Dry Gas      | 4.0 l/min |
| Scan End    | 2000 m/z   | Set Collision Cell RF | 600.0 Vpp | Set Divert Valve | Source    |

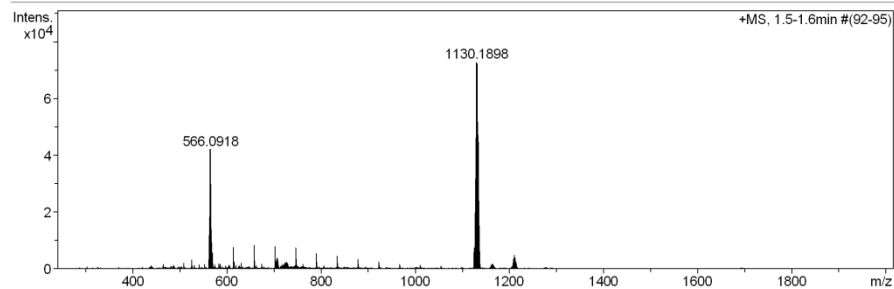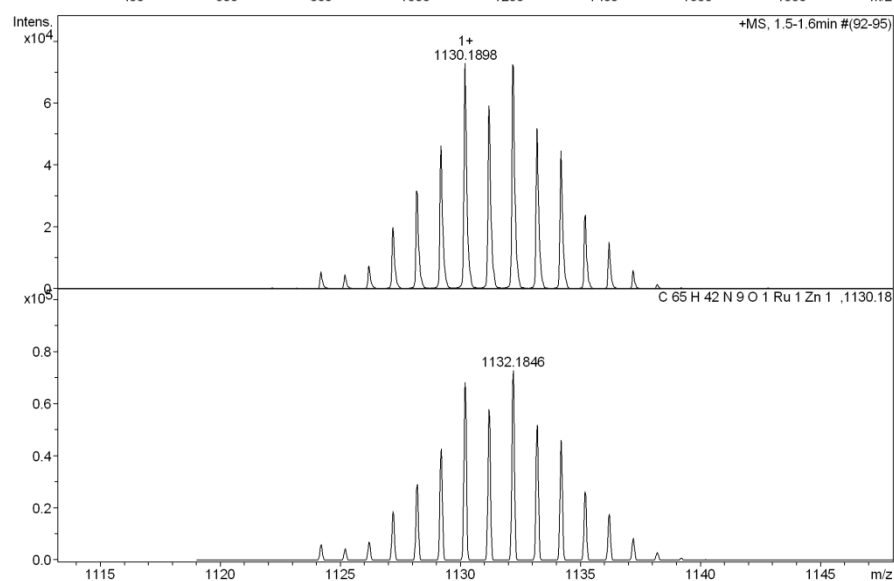

## Cyclic Voltammetry-oxidation of P1

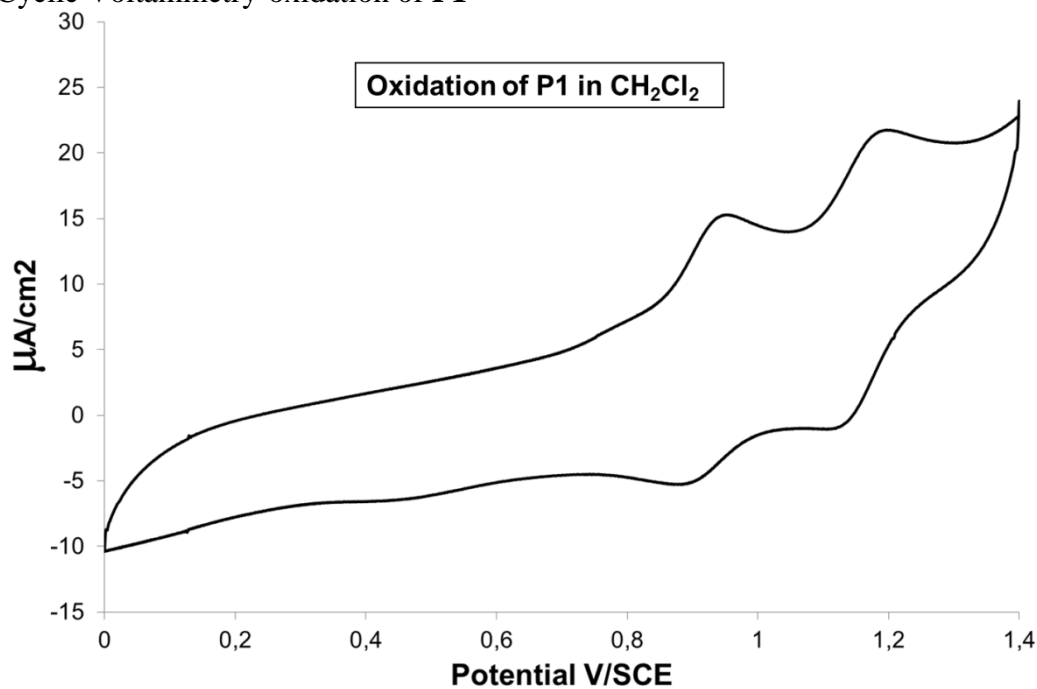

### Cyclic Voltammetry-reduction of **P1**

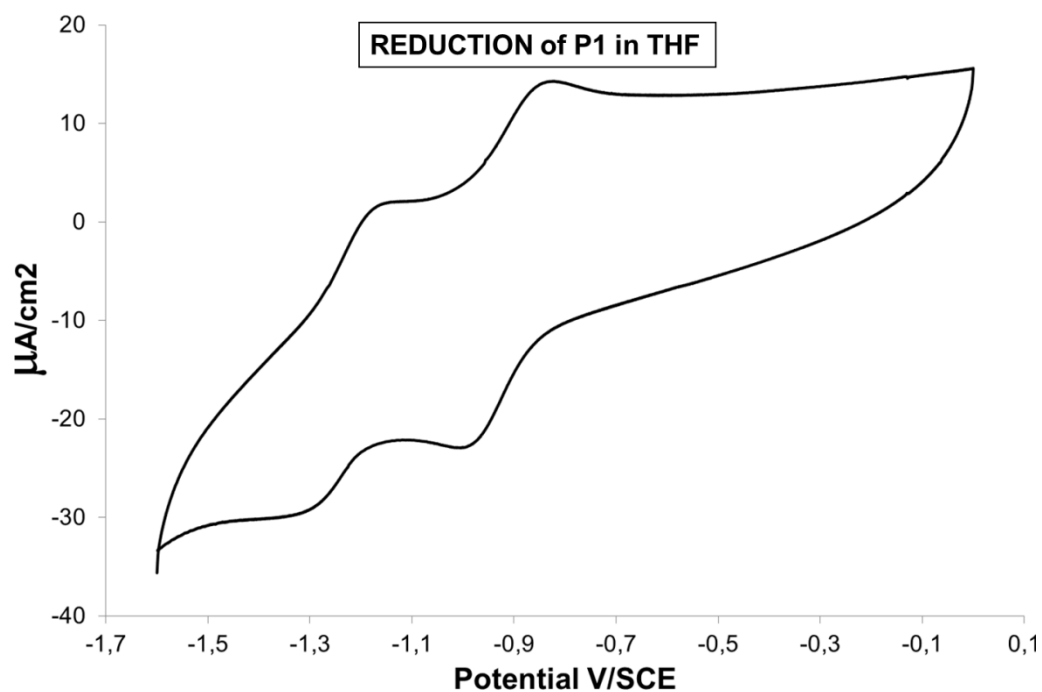

### Cyclic Voltammetry-oxidation of **P3**

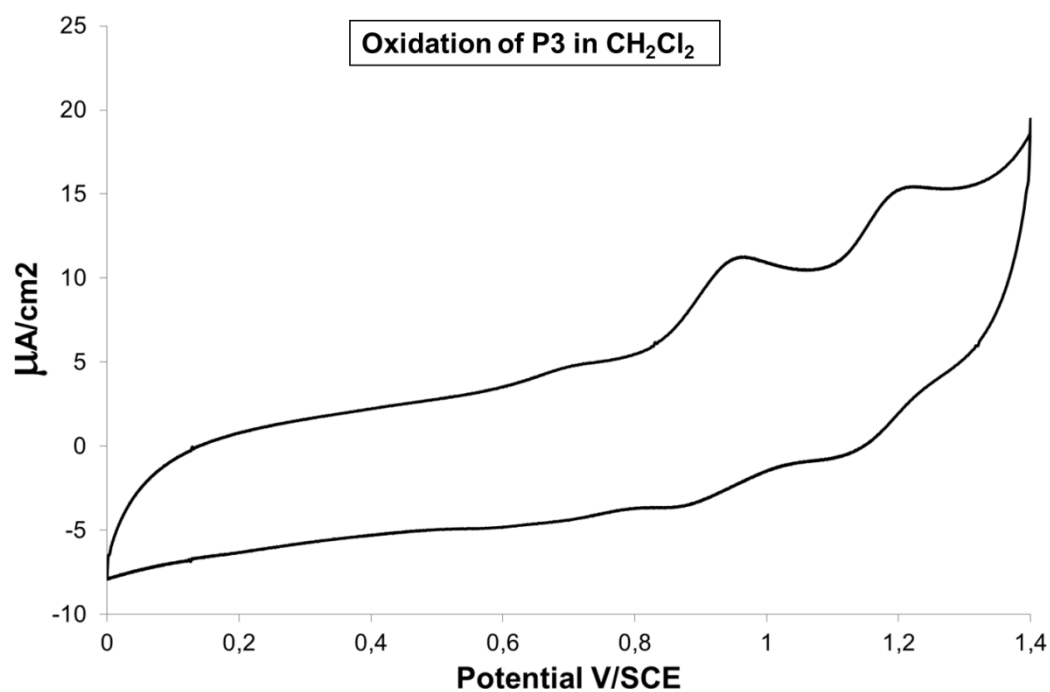

### Cyclic Voltammetry-reduction of P3

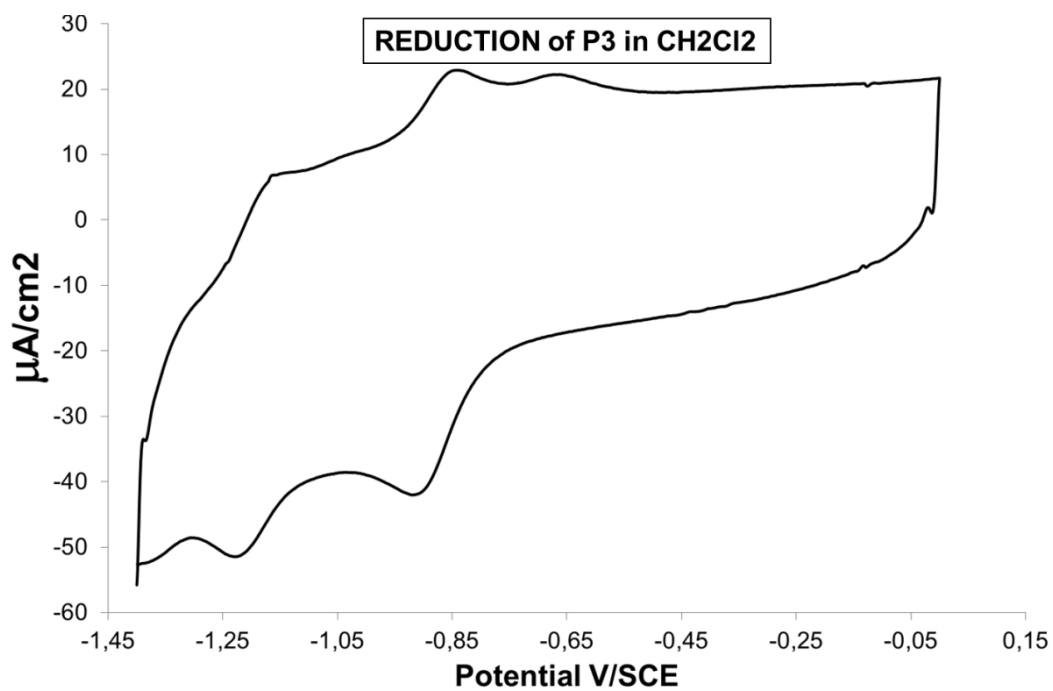

### Cyclic Voltammetry-oxidation of C1

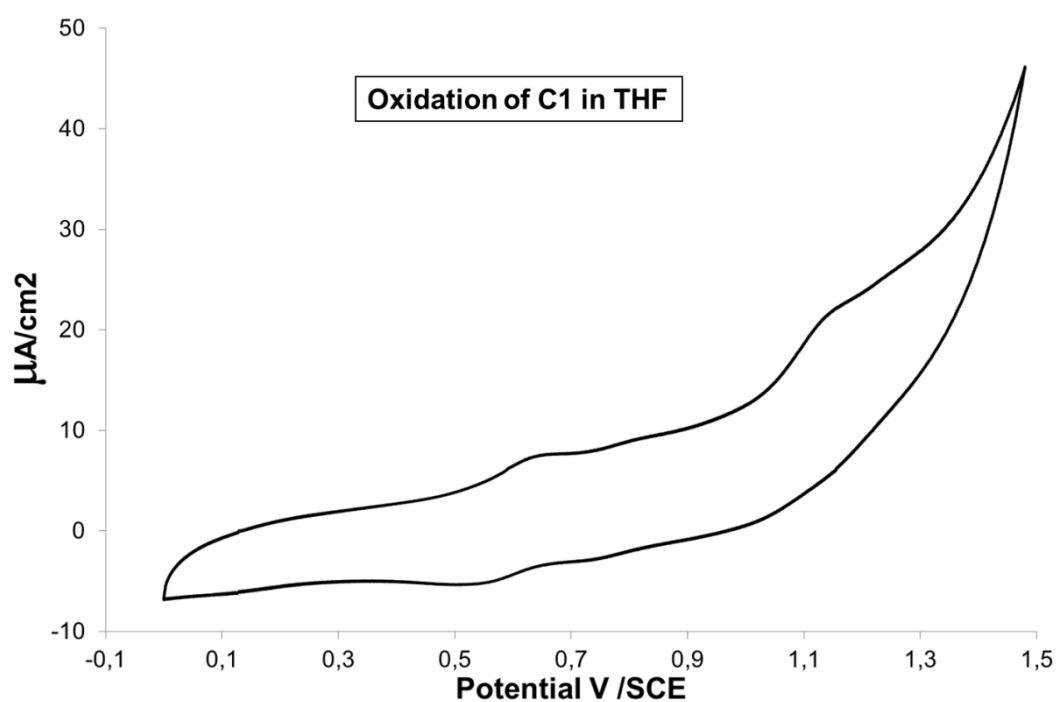

### Cyclic Voltammetry-reduction of C1

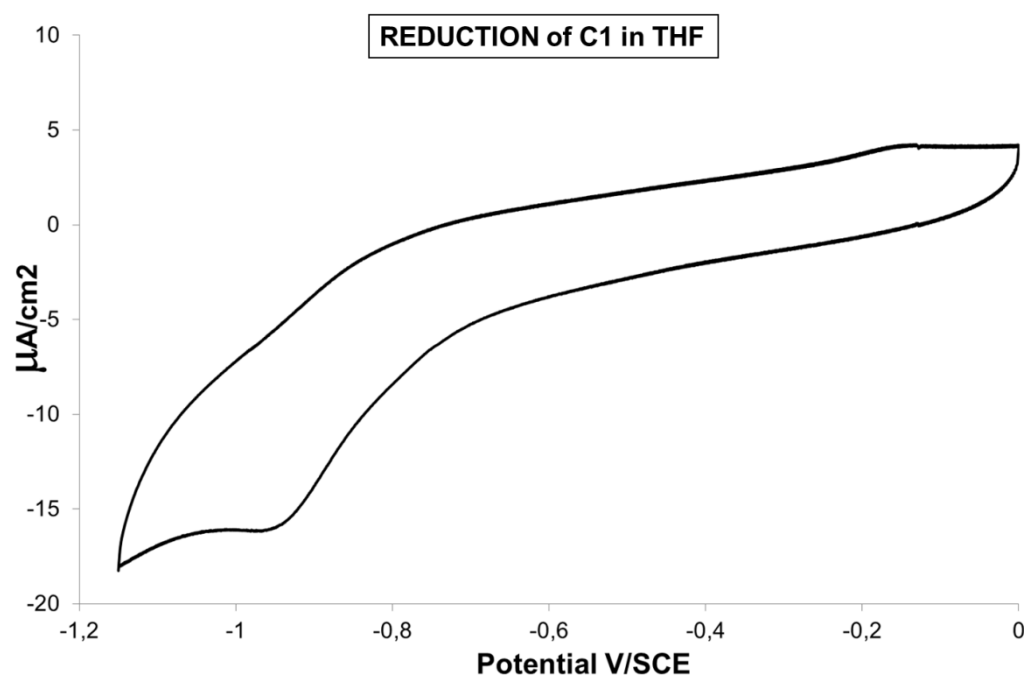

### Cyclic Voltammetry-oxidation of C2

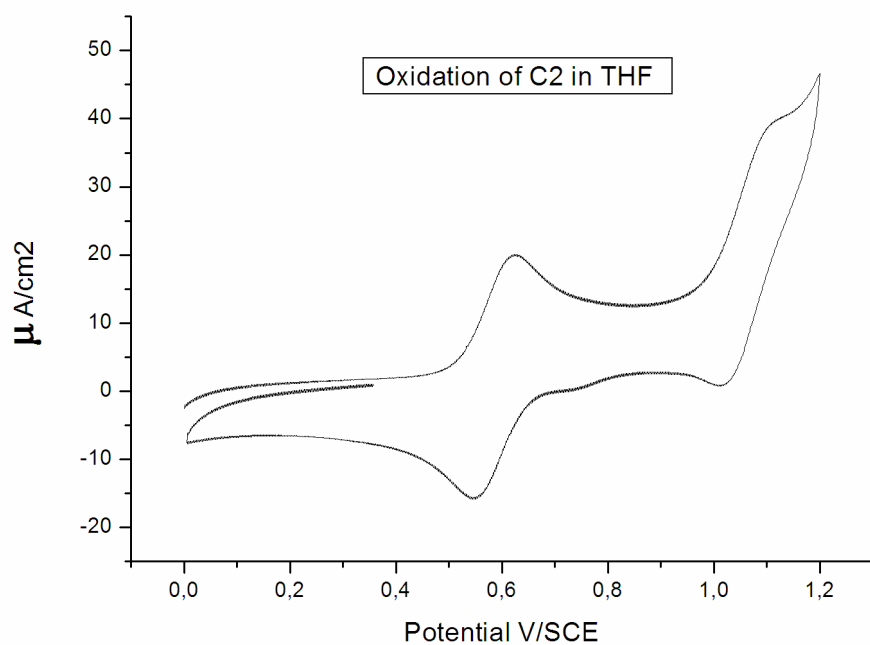



### Cyclic Voltammetry-reduction of C2

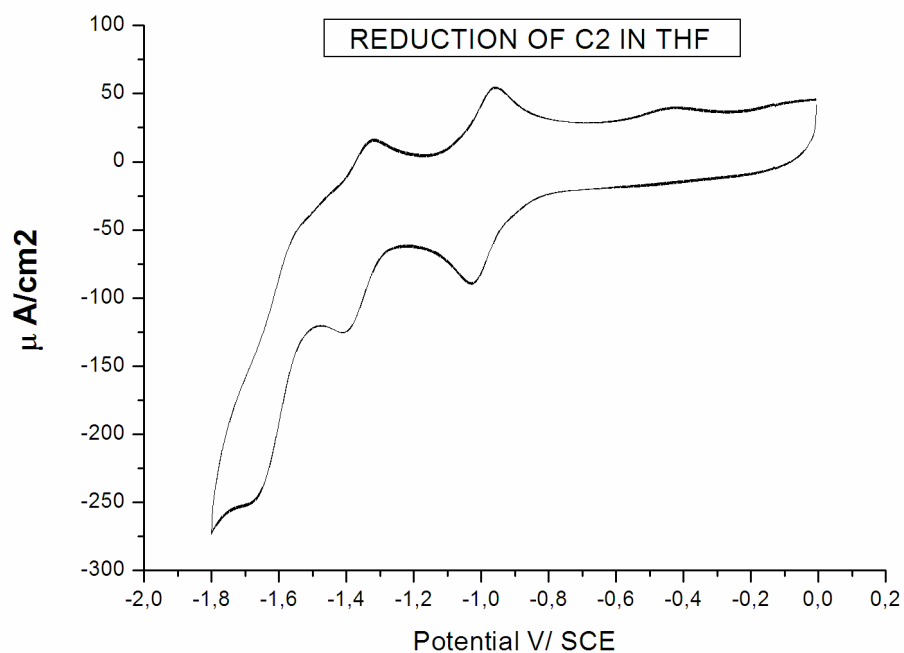

### Cyclic Voltammetry-oxidation of C3

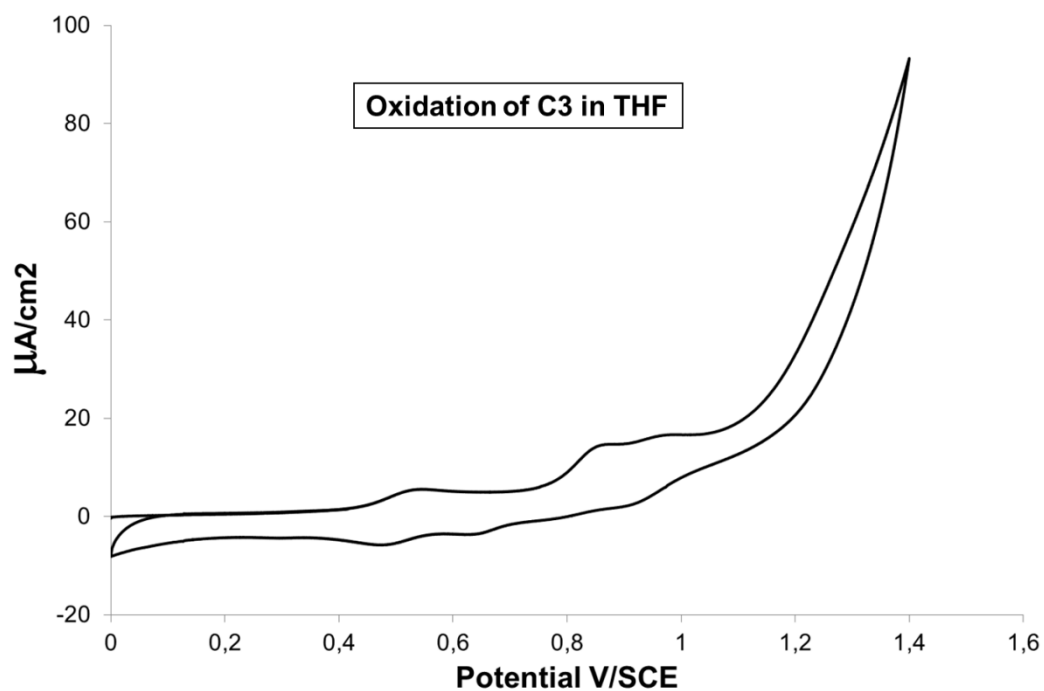

### Cyclic Voltammetry-reduction of C3

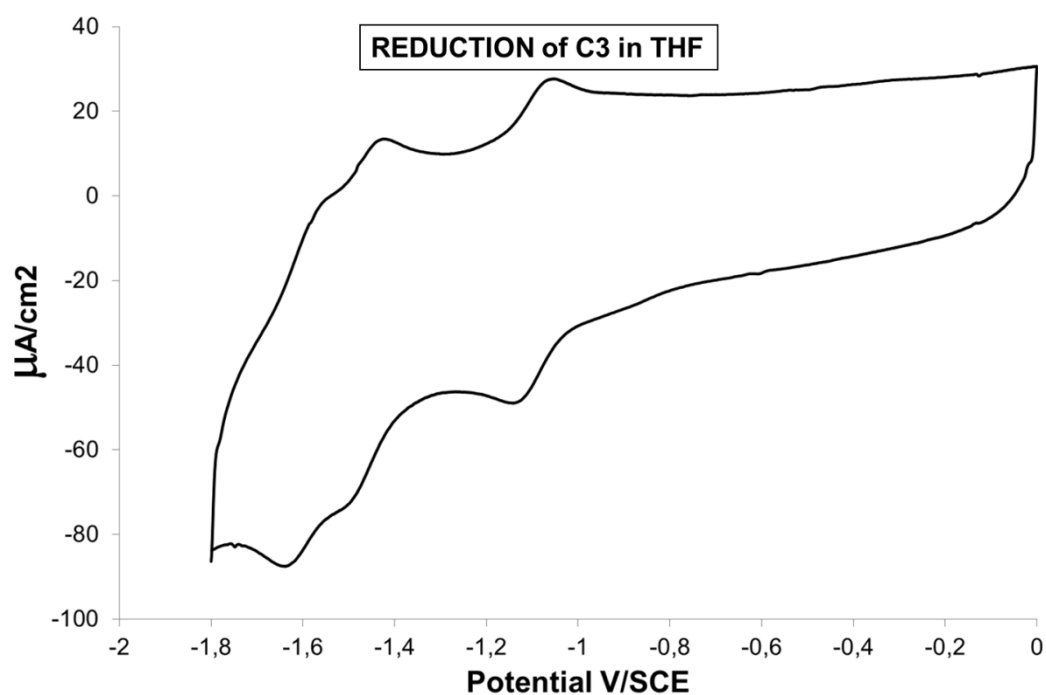

### Emission spectrum of P1 in CH<sub>2</sub>Cl<sub>2</sub> ( $\lambda_{\text{exc}} = 485\text{nm}$ )

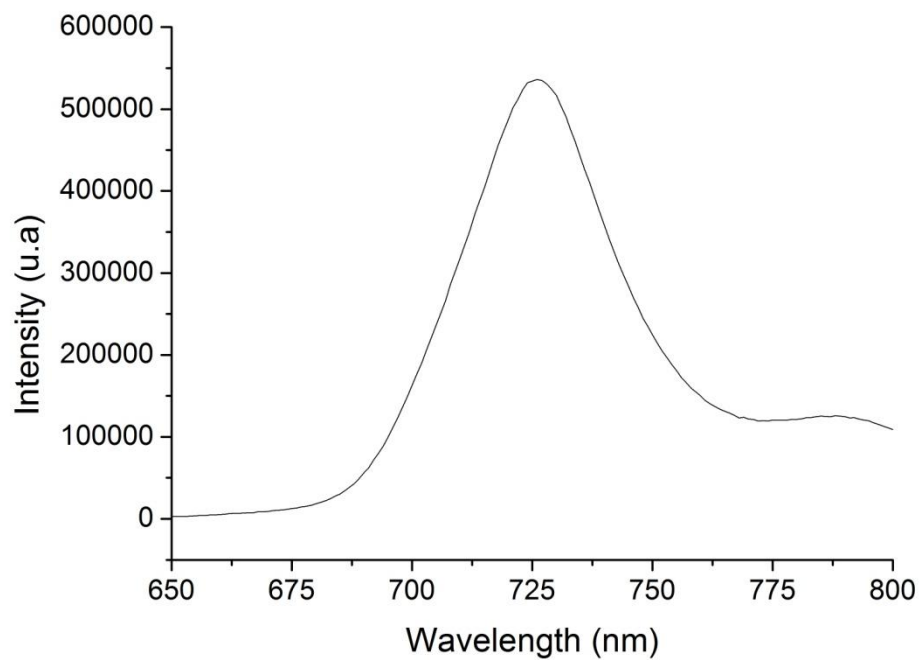

**Emission spectrum of C1 in CH<sub>3</sub>CN ( $\lambda_{exc}=438\text{nm}$ )**

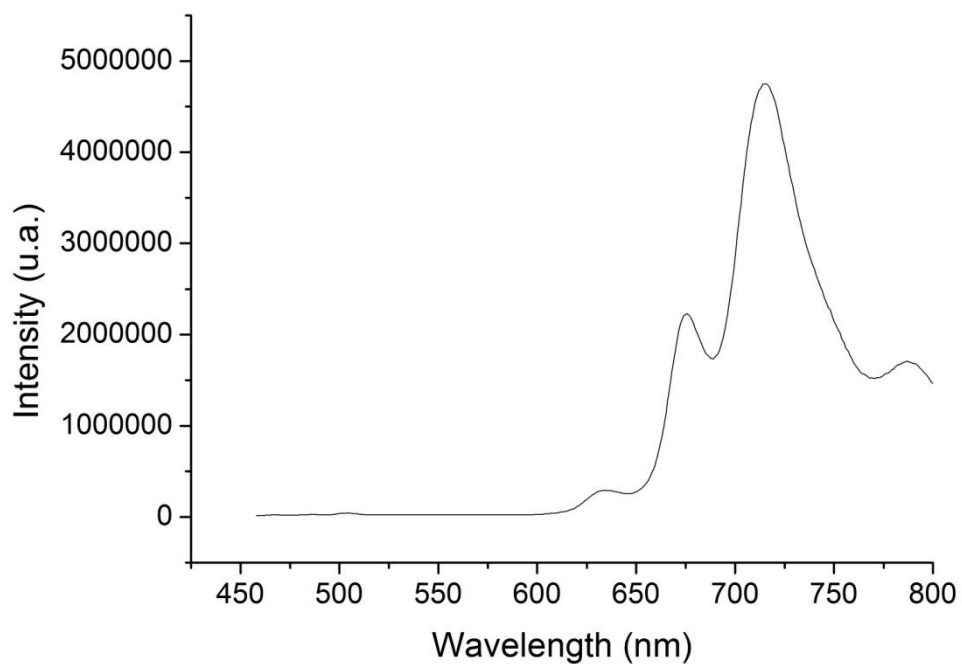

**Emission spectrum of C1 in CH<sub>3</sub>CN ( $\lambda_{exc}=536\text{nm}$ )**

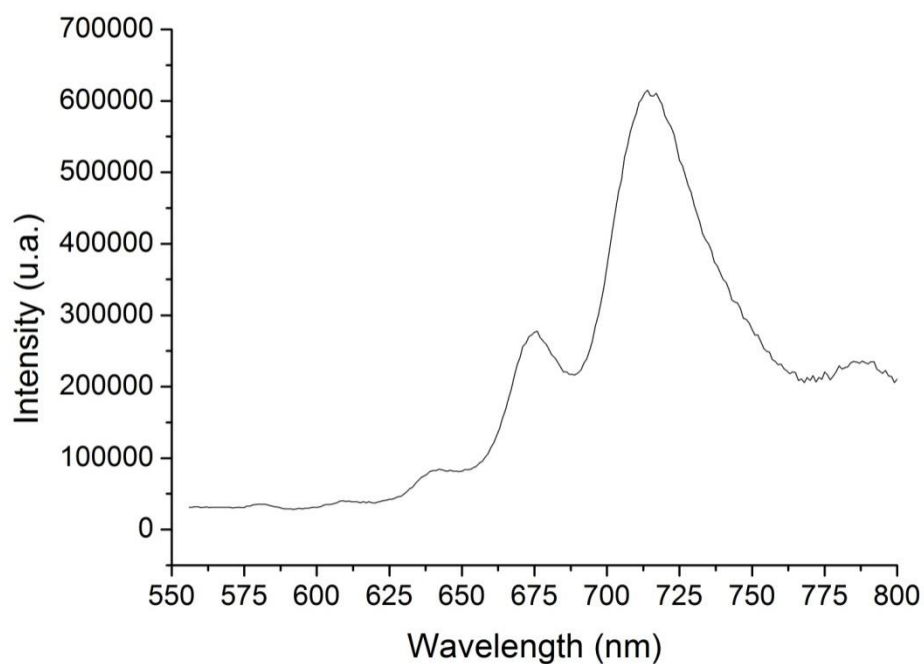

**Emission spectrum of P3 in CH<sub>2</sub>Cl<sub>2</sub> ( $\lambda_{exc}$ = 470nm)**

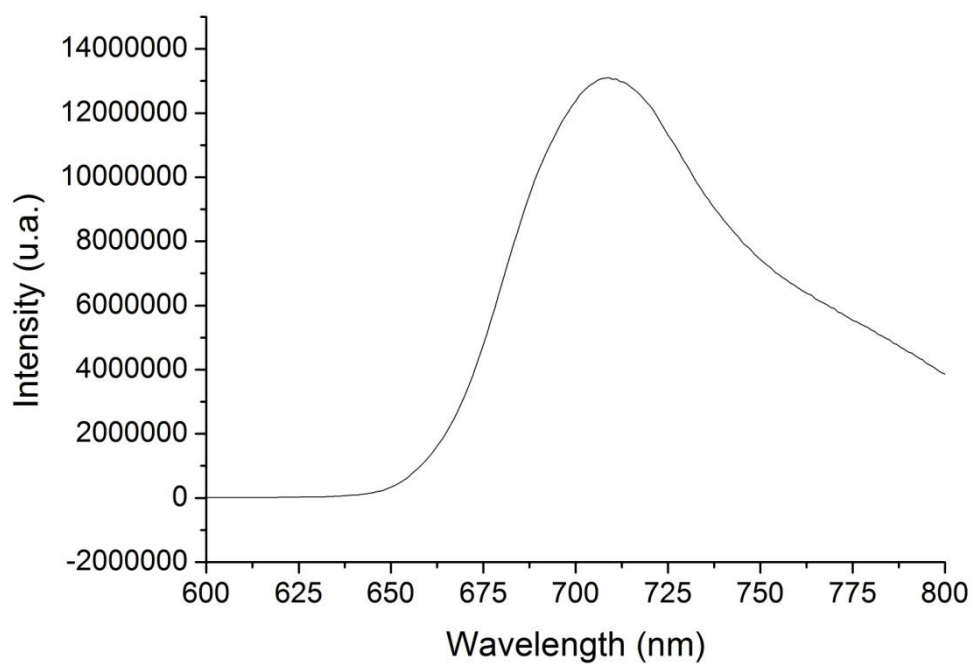

**Emission spectrum of C3 in CH<sub>3</sub>CN ( $\lambda_{exc}$ = 451nm)**

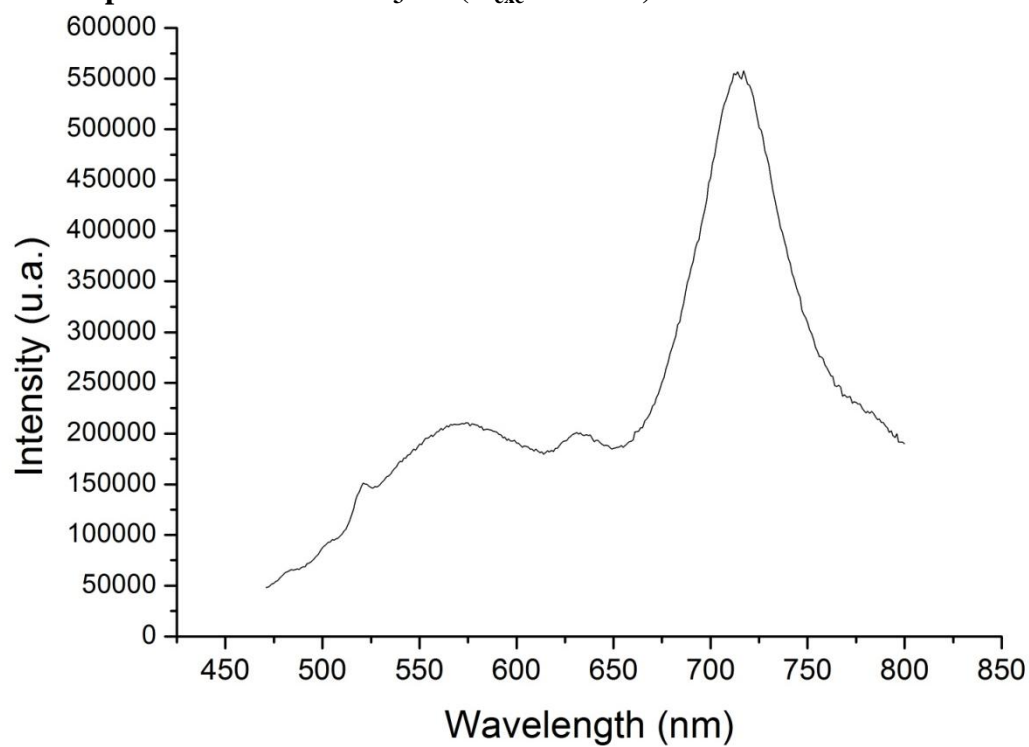

**Emission spectrum of C3 in CH<sub>3</sub>CN ( $\lambda_{exc}= 516\text{nm}$ )**

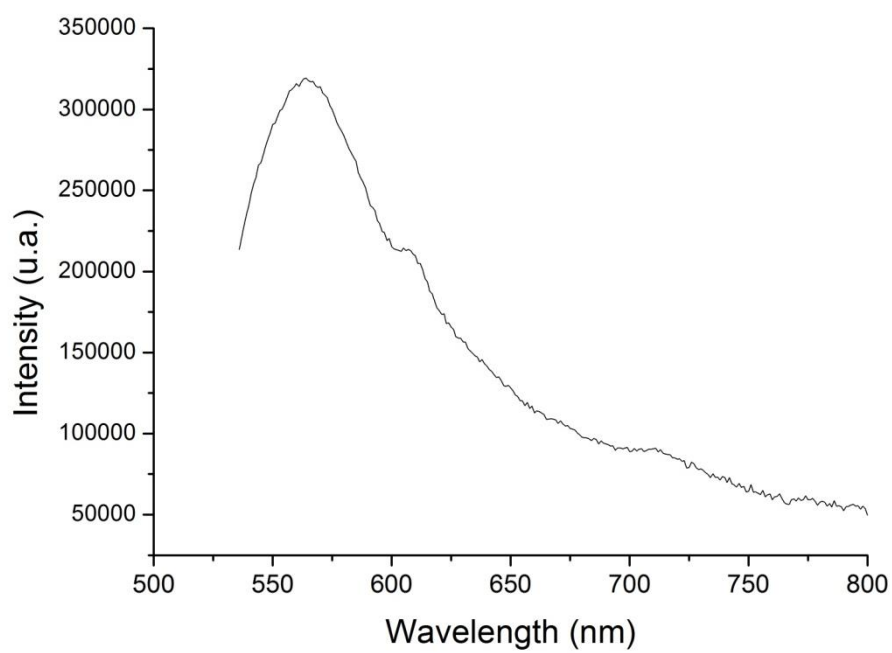

Supplement: c2dt31656k.pdf [file c2dt31656k.pdf]
